# Supplementary material for: Conservation of an Agrobacterium cT-DNA insert in Camellia section Thea reveals the ancient origin of tea plants from a genetically modified ancestor
Source: Front Plant Sci. 2022 Dec 6;13:997762. doi: 10.3389/fpls.2022.997762 (PMC9763466; doi:10.3389/fpls.2022.997762)
Supplement: Supplementary Table 1 — List of accessions and their indels, indicated by positions of the G240-CaTA. First column: composite numbers referring to species (as provided in the sequence description) and SRX accession number. Other columns: positions of indels according to G240-CaTA sequence, the position is the last nucleotide before the modification. For type of modifications, see Table 1 . [file Table_1.xlsx]

## Sheet: Feuil1
angus10143454_1	1
assam8233445_1	1					449c																														4183
assam8233447_1	1				441
assam8233449_1	1				441										2146a																			3962a
assam8233465_1	1				441																													3962a			4440
assam8233478_1	1				441																													3962a
assam8233492_1	1					449c																														4183
assam8233499_1	1				441
assam8233503_1	1				441																	2779
assam8233504_1	1				441																													3962a
assam8233506_1	1				441
assam8233510_1	1				441
assam8770633_1	1																														3687
assam8770662_1	1				441				1277
assam8770667_1	1				441
assam8833951_1	1				441
assam8833953_1	1				441
assam8836856_1	1				441
assam8837886_1	1				441																																		5347
assam8837892_1	1					449c
assam8842356_1	1
atro10143461_1	1				441																													3962a
atro8827014_1	1				441
crassi8822468_1	1														2152									3085			3471
fan10143457_1	1				441			640			1508	1712													2824		3182
gym10143464_1	1				441																													3962a			4440
kwang10143456_1	1
lepto10143463_1	1					449a														2748
makuan10143459_1	1																			2748
pubi8770663_1	1
pubi8822444_1	1				441
pubi8822457_1	1														2152
quin10560754_1	1	239												2001	2152									3085
quin10560755_1	1	239											1946									2779
quin10560757_1	1														2152
quin10560759_1	1	239													2152									3085
quin10560761_1	1														2152									3085
quin10560763_1	1	239			446										2152									3085
quin10560764_1	1	239			442										2152
quin10560765_1	1	239			442					1508			1946									2779
quin10560767_1	1				441										2152									3085
sin10808003_1	1				441
sin10808004_1	1				441																												3789	3962a
sin7372402_1	1				441						1790											2779				3393		3525
sin7372403_1	1																					2779
sin8233452_1	1				441																													3962a
sin8233453_1	1				441
sin8770640_1	1
sin8770648_1	1				441																													3962a
sin8770656_1	1				441
sin8770664_1	1				441																	2779
sin8770665_1	1																					2779
sin8770666_1	1																					2779
sin8822438_1	1																					2779
sin8822440_1	1											1928										2779
sin8822447_1	1				441
sin8822451_1	1				441																	2772
sin8822453_1	1				441																													3962a
sin8822458_1	1				441
sin8822462_1	1																					2779
sin8822463_1	1				441
sin8822464_1	1				441
sin8827015_1	1				441											2337
sin8836853_1	1				441																													3962a			4440
sin8837204_1	1				441
sin8837205_1	1		258		441																													3962a			4440
sin8842355_1	1				441
sin8850078_1	1
tach10663976_1	1																					2779
tach10663981_1	1
tach10663984_1	1				441																													3962a			4440
tachrem10663957_1	1																					2779										3716
tachrem10663967_1	1																					2779
tachrem10663970_1	1																					2779
tachrem10663975_1	1																					2779
tachrem10663979_1	1				441
tachrem10663980_1	1				441
tachrem10663982_1	1																					2779
tachrem10663983_1	1				441
tal10143460_1	1														2152									3085
tal10536496_1	1				438										2152							2779
tal10536497_1	1				441
angus10143454_2	2																			2748									3574
assam8233445_2	2				440																2770															4183
assam8233447_2	2
assam8233449_2	2				441
assam8233465_2	2				441
assam8233478_2	2				441
assam8233492_2	2																														3687
assam8233499_2	2				441
assam8233503_2	2				441
assam8233504_2	2				441											2337
assam8233506_2	2				441													2644
assam8233510_2	2				441
assam8770633_2	2				441
assam8770662_2	2				441																												3789	3962a
assam8770667_2	2				441
assam8833951_2	2				441
assam8833953_2	2
assam8836856_2	2				441																	2779
assam8837886_2	2				441
assam8837892_2	2																																			4183
assam8842356_2	2				441
atro10143461_2	2				441
atro8827014_2	2																					2779
crassi8822468_2	2														2152		2553
fan10143457_2	2				441						1508																3182
gym10143464_2	2
kwang10143456_2	2
lepto10143463_2	2				441
makuan10143459_2	2				441																													3962a			4440
pubi8770663_2	2				441
pubi8822444_2	2				441
pubi8822457_2	2		258			449b														2748
quin10560754_2	2												1946									2779
quin10560755_2	2				441										2152									3085
quin10560757_2	2												1946									2779
quin10560759_2	2												1946									2779
quin10560761_2	2	239								1508			1946									2779
quin10560763_2	2									1508			1946									2779
quin10560764_2	2												1946									2779
quin10560765_2	2														2152									3085
quin10560767_2	2	239								1508			1946									2779
sin10808003_2	2						626
sin10808004_2	2			255	441				1277
sin7372402_2	2
sin7372403_2	2				441
sin8233452_2	2
sin8233453_2	2				441
sin8770640_2	2				441																													3962a
sin8770648_2	2
sin8770656_2	2				441																													3962a
sin8770664_2	2																					2779
sin8770665_2	2				441																													3962a
sin8770666_2	2				441																													3962a			4440
sin8822438_2	2				441																													3962a			4440
sin8822440_2	2				441
sin8822447_2	2				441
sin8822451_2	2				441																													3962a
sin8822453_2	2																					2779
sin8822458_2	2				441
sin8822462_2	2				441
sin8822463_2	2				441
sin8822464_2	2				441																													3962a
sin8827015_2	2																			2748
sin8836853_2	2																					2779
sin8837204_2	2
sin8837205_2	2																					2779
sin8842355_2	2
sin8850078_2	2				441																													3962a
tach10663976_2	2				441
tach10663981_2	2				441
tach10663984_2	2
tachrem10663957_2	2				442																	2779
tachrem10663967_2	2																					2779
tachrem10663970_2	2				444										2152
tachrem10663975_2	2				441
tachrem10663979_2	2				441
tachrem10663980_2	2		258		441															2748
tachrem10663982_2	2																					2779
tachrem10663983_2	2				441																													3962a			4440
tal10143460_2	2	239								1508			1946									2779
tal10536496_2	2														2152							2779
tal10536497_2	2				441
assam8233432_Un	u				441
assam8233433_Un	u				441
assam8233450_Un	u				441
assam8233493_Un	u				441																													3962a
assam8233497_Un	u				441																2770
assam8233498_Un	u				441
assam8233500_Un	u				441
assam8233501_Un	u				441
assam8233502_Un	u				441
assam8233507_Un	u				441
assam8233508_Un	u				441
assam8233509_Un	u				441
assam8770623_Un	u				441
assam8770647_Un	u				441
assam8822465_Un	u				441
assam8822467_Un	u				441
assam8827009_Un	u				441																													3962c
assam8827011_Un	u				441
assam8837883_un	u																			2748										3664
assam8837884_Un	u				441
FDDB_Un	u				441																																		5347
gym8827016_Un	u				441
gym8837885_Un	u				441
ptilo10143466_Un	u							1012											2744	2748
quin10560756_Un	u												1946									2779
quin10560758_Un	u												1946									2779
quin10560760_Un	u												1946									2779
quin10560762_Un	u												1946									2779
quin10560766_Un	u									1508			1946									2779
quin10560768_Un	u	239													2152									3085
sin10143493_Un	u				441										2146b																			3962a
sin10143494_Un	u				441																	2779												3962a
sin10580104_Un	u				441																													3962a			4440
sin8770624_Un	u				441																													3962a
sin8770635_Un	u				441																													3962b
sin8770638_Un	u				441																													3962f
sin8770644_Un	u				441																													3962a
sin8770649_Un	u				441																													3962a
sin8770652_Un	u				441										2146a																			3962d
sin8770658_Un	u				441																													3962b
sin8822439_Un	u				441																													3962a			4440
sin8822459_Un	u				441
sin8837207_Un	u				441
sin8837208_Un	u				441																													3962a
sin8837888_Un	u				441																													3962b
sin8842353_Un	u				441																													3962b
sin8842357_Un	u				441																														3969
sin8842358_Un	u				441																													3962b
sin8850079_Un	u				441																													3962a
sin9217294_Un	u				441																													3962a
sinG240-JACBKZ_Un	u				441																	2779
tachrem10143455_Un	u				441																													3962a			4440
tachrem10663958_Un	u																					2779
tachrem10663960_Un	u											1928										2779
tachrem10663966_Un	u																					2779
tachrem10663972_Un	u				441																													3962a			4440
tal10536492_Un	u																					2779
tal10536493_Un	u																					2779
tal10536494_Un	u																					2779
tal10536504_Un	u																					2779
tetra10143467_Un	u				441																													3962a			4440
